# Supplementary material
Source: publisher figshare collection journal article supplement (https://acs.figshare.com/ndownloader/files/3738253)
Supplement: Supplementary file 1 [file 3738253]

data_she1319 
_audit_creation_date        "13-06-21"
_audit_creation_method CRYSTALS_ver_14.40
_audit_update_record                   
;
2013-06-21 - Report on C19 H14 Fe2 O7
             by Anthony C. Willis
             for Henry Toombs-Ruane and Mick Sherburn
2013-06-21 - passes checkcif tests with minor warnings
; 

_oxford_structure_analysis_title  'she1319 At 10:24 on 21/ 6/13'
_chemical_name_systematic         ?
_chemical_melting_point           ?

_cell_length_a                    9.8528(2)
_cell_length_b                    16.6280(2)
_cell_length_c                    12.4642(2)
_cell_angle_alpha                 90
_cell_angle_beta                  108.7649(8)
_cell_angle_gamma                 90
_cell_volume                      1933.50(6)
 
_symmetry_cell_setting            'monoclinic' 
_symmetry_space_group_name_H-M    'P 1 21/c 1 ' 
_symmetry_space_group_name_Hall   '-P 2ybc ' 
loop_
 _symmetry_equiv_pos_as_xyz
 'x,y,z'
 '-x,-y,-z'
 '-x,y+1/2,-z+1/2'
 'x,-y+1/2,z+1/2'

loop_
_atom_type_symbol
_atom_type_scat_dispersion_real
_atom_type_scat_dispersion_imag
_atom_type_scat_Cromer_Mann_a1
_atom_type_scat_Cromer_Mann_b1
_atom_type_scat_Cromer_Mann_a2
_atom_type_scat_Cromer_Mann_b2
_atom_type_scat_Cromer_Mann_a3
_atom_type_scat_Cromer_Mann_b3
_atom_type_scat_Cromer_Mann_a4
_atom_type_scat_Cromer_Mann_b4
_atom_type_scat_Cromer_Mann_c
_atom_type_scat_source  
 C       0.0033   0.0016   2.3100  20.8439   1.0200  10.2075   1.5886   0.5687
   0.8650  51.6512   0.2156 'International Tables Vol C 4.2.6.8 and 6.1.1.4'
 H       0.0000   0.0000   0.4930  10.5109   0.3229  26.1257   0.1402   3.1424
   0.0408  57.7998   0.0030 'International Tables Vol C 4.2.6.8 and 6.1.1.4'
 Fe      0.3463   0.8444  11.7695   4.7611   7.3573   0.3072   3.5222  15.3535
   2.3045  76.8805   1.0369 'International Tables Vol C 4.2.6.8 and 6.1.1.4'
 O       0.0106   0.0060   3.0485  13.2771   2.2868   5.7011   1.5463   0.3239
   0.8670  32.9089   0.2508 'International Tables Vol C 4.2.6.8 and 6.1.1.4'
 
 
_cell_formula_units_Z                    4

# Given Formula = C19 H14 Fe2 O7 
# Dc =      1.60 Fooo =    944.00 Mu =     15.38 M =    466.01
# Found Formula = C19 H14 Fe2 O7 
# Dc =      1.60 FOOO =    944.00 Mu =     15.38 M =    466.01

_chemical_formula_sum             'C19 H14 Fe2 O7'
_chemical_formula_moiety          'C19 H14 Fe2 O7'
_chemical_compound_source                local
_chemical_formula_weight            466.01
 
 
_cell_measurement_reflns_used        38060
_cell_measurement_theta_min              2.6
_cell_measurement_theta_max             30
_cell_measurement_temperature          200
 
_exptl_crystal_description        'block' 
_exptl_crystal_colour             'yellow' 
_exptl_crystal_size_min           0.150 
_exptl_crystal_size_mid           0.210 
_exptl_crystal_size_max           0.400 
 
_exptl_crystal_density_diffrn     1.601 
_exptl_crystal_density_meas       ? 
_exptl_crystal_density_method     'not measured' 
# Non-dispersive F(000): 
_exptl_crystal_F_000              944 
_exptl_absorpt_coefficient_mu     1.538 
 
# Sheldrick geometric approximatio 0.72 0.79 
# Absorption correction 

loop_
_exptl_crystal_face_index_h 
_exptl_crystal_face_index_k 
_exptl_crystal_face_index_l 
_exptl_crystal_face_perp_dist 
    1    0    0  0.020
   -1    0    0  0.130
    0    1    0  0.130
    0   -1    0  0.080
    0    0    1  0.180
    0    0   -1  0.240
    0   -4    4  0.119
    0    2    1  0.170
    1    1   -2  0.208
   -1   -1    2  0.177


_exptl_absorpt_correction_type 'integration' 
_exptl_absorpt_correction_T_min  0.604
_exptl_absorpt_correction_T_max  0.805
_exptl_absorpt_process_details
;
via Gaussian method (Coppens, 1970) implemented in maXus (2000)
;
#_diffrn_reflns_av_R_equivalents   0.029

# For a Kappa CCD, set Tmin to 1.0 and 
# Tmax to the ratio of max:min frame scales in scale_all.log 
_diffrn_measurement_device_type   'Nonius KappaCCD' 
_diffrn_measurement_device        'Area' 
_diffrn_radiation_monochromator   'graphite' 
_diffrn_radiation_type            'Mo K\a'
_diffrn_radiation_wavelength           0.71073
_diffrn_measurement_method        '\f & \w scans' 
_diffrn_special_details
;
CCD data collecting conditions-
phi and omega scans of width 1.8 deg at rate 39 sec/frame
and at 3.9 sec/frame,
crystal-detector distance 30mm,
multiple scan sets so over 90 percent of data collected with 4-fold  
redundancy or more.
;
 
# If a reference occurs more than once, delete the author 
# and date from subsequent references. 
_computing_data_collection        'COLLECT (Nonius, 2001).' 
_computing_cell_refinement        'DENZO/SCALEPACK (Otwinowski & Minor, 1997)' 
_computing_data_reduction         'DENZO/SCALEPACK (Otwinowski & Minor, 1997)' 
_computing_structure_solution     'SIR92 (Altomare et al., 1994)' 
_computing_structure_refinement   'CRYSTALS (Betteridge et al., 2003)' 
_computing_publication_material   'CRYSTALS (Betteridge et al., 2003)' 
_computing_molecular_graphics 
; 
ORTEP-II (Johnson 1976) in teXsan (MSC, 1992-1997)
; 
 
_diffrn_standards_interval_time   . 
_diffrn_standards_interval_count  . 
_diffrn_standards_number          0 
_diffrn_standards_decay_%         ? 
 
_diffrn_ambient_temperature        200
_diffrn_reflns_number             52908 
_reflns_number_total              5655 
_diffrn_reflns_av_R_equivalents   0.035 
# Number of reflections without Friedels Law is 0 
# Number of reflections with Friedels Law is 5655 
# Theoretical number of reflections is about 11314 
 
 
_diffrn_reflns_theta_min          2.612 
_diffrn_reflns_theta_max          30.033 
_diffrn_measured_fraction_theta_max 0.999 
 
_diffrn_reflns_theta_full         30.033 
_diffrn_measured_fraction_theta_full 0.999 
 
 
_diffrn_reflns_limit_h_min        -13 
_diffrn_reflns_limit_h_max        13 
_diffrn_reflns_limit_k_min        -22 
_diffrn_reflns_limit_k_max        23 
_diffrn_reflns_limit_l_min        -17 
_diffrn_reflns_limit_l_max        17 
_reflns_limit_h_min               -13 
_reflns_limit_h_max               13 
_reflns_limit_k_min               0 
_reflns_limit_k_max               23 
_reflns_limit_l_min               0 
_reflns_limit_l_max               17 
 
_oxford_diffrn_Wilson_B_factor    2.29 
_oxford_diffrn_Wilson_scale       3.19 
 
_atom_sites_solution_primary      direct #heavy,direct,difmap,geom
# _atom_sites_solution_secondary  difmap
_atom_sites_solution_hydrogens    difmap
 
_refine_diff_density_min          -0.41 
_refine_diff_density_max          0.42 
 
 
# The current dictionary definitions do not cover the 
# situation where the reflections used for refinement were 
# selected by a user-defined sigma threshold 
 
 
# The values actually used during refinement 
_oxford_reflns_threshold_expression_ref     I>-10.0\s(I)
_refine_ls_number_reflns          5653 
_refine_ls_number_restraints      0 
_refine_ls_number_parameters      295 
_oxford_refine_ls_R_factor_ref    0.0347 
_refine_ls_wR_factor_ref          0.0649 
_refine_ls_goodness_of_fit_ref    0.9870 
_refine_ls_shift/su_max           0.0056988 
_refine_ls_shift/su_mean          0.0004756 
 
 
# The values computed with all filters except I/sigma 
_oxford_reflns_number_all         5653 
_refine_ls_R_factor_all           0.0347 
_refine_ls_wR_factor_all          0.0649 
 
# The values computed with a 2 sigma cutoff - a la SHELX 
_reflns_threshold_expression      I>2.0\s(I)
_reflns_number_gt                 4777 
_refine_ls_R_factor_gt            0.0264 
_refine_ls_wR_factor_gt           0.0611 
 
# choose from: rm (reference molecule of known chirality), 
# ad (anomolous dispersion - Flack), rmad (rm and ad), 
# syn (from synthesis), unk (unknown) or . (not applicable). 
_chemical_absolute_configuration  '.' 
 
 
_refine_ls_structure_factor_coef  Fsqd 
_refine_ls_matrix_type            full
_refine_ls_hydrogen_treatment     refxyz         #undef, noref, refall,
                                             # refxyz, refU, constr or mixed
_refine_ls_weighting_scheme       calc 
_refine_ls_weighting_details 
;
 Method= Modified Sheldrick 
 w=1/[\s^2^(F^2^) + ( 0.03P)^2^ + 0.83P] 
 ,where P=(max(Fo^2^,0) + 2Fc^2^)/3 
;
#                                                                             
# 1. SUBMISSION DETAILS                                                       
_publ_requested_journal               ' test '
_publ_requested_category               fm
_publ_contact_author_name             ' Anthony C. Willis '

_publ_contact_author_address
;
Research School of Chemistry,
The Australian National University,
Canberra, A. C. T. 0200, Australia
;
_publ_contact_letter
;
    ENTER TEXT OF LETTER
;

_publ_requested_coeditor_name          ?
_publ_contact_author_phone            ' 61 2 6125 4109 '
_publ_contact_author_fax              ' 61 2 6125 0750 '
_publ_contact_author_email            ' willis@rsc.anu.edu.au '
                                                                                
#=============================================================================  
# 2. PROCESSING SUMMARY (IUCr Office Use Only)                                  
_journal_date_recd_electronic     ?                                             
_journal_date_to_coeditor         ?                                             
_journal_date_from_coeditor       ?                                             
_journal_date_accepted            ?                                             
_journal_date_printers_first      ?                                             
_journal_date_printers_final      ?                                             
_journal_date_proofs_out          ?                                             
_journal_date_proofs_in           ?                                             
_journal_coeditor_name            ?                                             
_journal_coeditor_code            ?                                             
_journal_coeditor_notes                                                         
;                                                                               
                                  ?                                             
;                                                                               
_journal_techeditor_code          ?                                             
_journal_techeditor_notes                                                       
;                                                                               
                                  ?                                             
;                                                                               
_journal_coden_ASTM               ?                                             
_journal_name_full                ?                                             
_journal_year                     ?                                             
_journal_volume                   ?                                             
_journal_issue                    ?                                             
_journal_page_first               ?                                             
_journal_page_last                ?                                             
_journal_suppl_publ_number        ?                                             
_journal_suppl_publ_pages         ?                                             
#=============================================================================  
# 3. TITLE AND AUTHOR LIST                                                      
_publ_section_title                                                             
;                                                                               
Crystal structure of C~19~H~14~Fe~2~O~7~
 --- she1319 
;                                                                               
# The loop structure below should contain the names and addresses of all        
# authors, in the required order of publication. Repeat as necessary.           
loop_
_publ_author_name
_publ_author_address
' Henry Toombs-Ruane '
;
Research School of Chemistry,
The Australian National University,
Canberra, A. C. T. 0200, Australia
;
' Michael S. Sherburn '
;
Research School of Chemistry,
The Australian National University,
Canberra, A. C. T. 0200, Australia
;
' Anthony C. Willis '
;
Research School of Chemistry,
The Australian National University,
Canberra, A. C. T. 0200, Australia
;
#============================================================================== 
# 4. TEXT                                                                       
_publ_section_abstract  #Text of the abstract                                   
;                                                                               
The crystal structure of C~19~H~14~Fe~2~O~7~
 is reported.
;                                                                               
_publ_section_comment  #Text of the paper                                       
;                                                                               


The crystallographic asymmetric unit consists of 
one molecule of C~19~H~14~Fe~2~O~7~.

;                                                                               
_publ_section_acknowledgements  # Acknowledgments                               
;                                                                               
?                                                                               
;                                                                               
_publ_section_figure_captions  #Captions to figures                             
;                                                                               
?                                                                               
;                                                                               
#_publ_section_exptl_refinement 
_refine_special_details
# see also _refine_ls_hydrogen for refinement keywords.                         
;

 
Hydrogen atoms were 
observed in a difference electron density map and
included at calculated positions.
They were initially refined with soft restraints on the 
bond lengths and angles to regularise their geometry 
(C---H in the range 0.93--0.98) and on
U~iso~(H) (in the range 1.2-1.5 times U~eq~ of the parent atom).
Subsequently H atom positional parameters
were refined freely and the displacement parameters were held fixed.


The largest peaks in the final difference electron density map are
located near carbonyl atoms
or halfway along C---C bonds.

;                                                                               
_publ_section_exptl_prep                                                        
;                                                                               
    The compound was prepared by HTR and was 
recrystallised from diethylether.  
The sample ID is htr-D23A.
;                                                                               
#**************************************************************************** 


# Insert your own references if required - in alphabetical order 
_publ_section_references 
; 

Mackay, S., Gilmore, C. J.,Edwards, C., Stewart, N. & Shankland, K.
(2000). maXus  Computer Program for the Solution and Refinement of
Crystal Structures. Nonius, The Netherlands, MacScience, Japan & The
University of Glasgow.

Coppens, P. (1970).  The Evaluation of Absorption and Extinction in
Single-Crystal Structure Analysis.  Crystallographic Computing.  F. R. Ahmed,
S. R. Hall and C. P. Huber, eds., Munksgaard. Copenhagen. pp 255-270.

 
Altomare, A., Cascarano, G., Giacovazzo, G., Guagliardi, A., Burla, M.C., 
Polidori, G. & Camalli, M. (1994). J. Appl. Cryst. 27, 435. 
 
Betteridge, P.W., Carruthers, J.R., Cooper, R.I., 
Prout, K. & Watkin, D.J. (2003). J. Appl. Cryst. 36, 1487. 
 
Nonius (1997-2001). COLLECT. Nonius BV, Delft, The Netherlands. 
 
Otwinowski, Z. & Minor, W. (1997). Methods in Enzymology, Vol. 276, 
edited by C. W. Carter Jr & R. M. Sweet, pp. 307--326. 
New York: Academic Press. 

Molecular Structure Corporation. (1992-1997). teXsan. 
Single Crystal Structure Analysis Software. Version 1.8.
MSC, 3200 Research Forest Drive, The Woodlands, TX 77381, USA.

Johnson, C.K. (1976)
ORTEP-II, A Fortran Thermal-Ellipsoid Plot Program, Report ORNL-5138, 
Oak Ridge National Laboratory, Oak Ridge, Tennessee, USA.


; 

# Uequiv = arithmetic mean of Ui i.e. Ueqiv = (U1+U2+U3)/3

# Replace last . with number of unfound hydrogen atoms attached to an atom.

# ..._refinement_flags_... 
# . no refinement constraints           S special position constraint on site
# G rigid group refinement of site      R riding atom
# D distance or angle restraint on site T thermal displacement constraints
# U Uiso or Uij restraint (rigid bond)  P partial occupancy constraint


loop_
_atom_site_label
_atom_site_type_symbol
_atom_site_fract_x
_atom_site_fract_y
_atom_site_fract_z
_atom_site_U_iso_or_equiv
_atom_site_occupancy
_atom_site_adp_type
_atom_site_refinement_flags_posn
_atom_site_refinement_flags_adp
_atom_site_refinement_flags_occupancy
_atom_site_disorder_assembly
_atom_site_disorder_group
_atom_site_attached_hydrogens
Fe1 Fe 0.66493(2) 0.305994(12) 0.472610(16) 0.0281 1.0000 Uani . . . . . . 
Fe2 Fe 0.17182(2) 0.106486(11) 0.307114(16) 0.0269 1.0000 Uani . . . . . . 
O1 O 0.53431(11) 0.14554(7) 0.57896(9) 0.0374 1.0000 Uani . . . . . . 
O2 O 0.86960(14) 0.20575(9) 0.64339(12) 0.0593 1.0000 Uani . . . . . . 
O3 O 0.85895(16) 0.37708(9) 0.36364(12) 0.0603 1.0000 Uani . . . . . . 
O4 O 0.65792(19) 0.42506(9) 0.64390(13) 0.0692 1.0000 Uani . . . . . . 
O5 O 0.19751(14) 0.25473(8) 0.18868(11) 0.0509 1.0000 Uani . . . . . . 
O6 O -0.03094(15) 0.18131(9) 0.40602(13) 0.0602 1.0000 Uani . . . . . . 
O7 O -0.02983(14) 0.02865(8) 0.10870(11) 0.0543 1.0000 Uani . . . . . . 
C1 C 0.47851(13) 0.15129(8) 0.47676(11) 0.0274 1.0000 Uani . . . . . . 
C2 C 0.50874(13) 0.22137(8) 0.41075(11) 0.0265 1.0000 Uani . . . . . . 
C3 C 0.44370(15) 0.29783(8) 0.41235(12) 0.0299 1.0000 Uani . . . . . . 
C4 C 0.60891(16) 0.21532(9) 0.34960(13) 0.0326 1.0000 Uani . . . . . . 
C5 C 0.48875(17) 0.36040(10) 0.35301(13) 0.0365 1.0000 Uani . . . . . . 
C6 C 0.34727(17) 0.31122(10) 0.47993(14) 0.0383 1.0000 Uani . . . . . . 
C7 C 0.2551(3) 0.37068(14) 0.4635(2) 0.0619 1.0000 Uani . . . . . . 
C8 C 0.37801(14) 0.08784(8) 0.41155(12) 0.0277 1.0000 Uani . . . . . . 
C9 C 0.28155(14) 0.04735(8) 0.45882(12) 0.0291 1.0000 Uani . . . . . . 
C10 C 0.36691(15) 0.06593(9) 0.29735(13) 0.0337 1.0000 Uani . . . . . . 
C11 C 0.18595(16) -0.00827(9) 0.38642(13) 0.0346 1.0000 Uani . . . . . . 
C12 C 0.26379(16) 0.07100(9) 0.56778(13) 0.0341 1.0000 Uani . . . . . . 
C13 C 0.2077(2) 0.02362(13) 0.62737(16) 0.0498 1.0000 Uani . . . . . . 
C14 C 0.78809(16) 0.24342(9) 0.57687(14) 0.0381 1.0000 Uani . . . . . . 
C15 C 0.78636(18) 0.34999(9) 0.40871(13) 0.0386 1.0000 Uani . . . . . . 
C16 C 0.66288(19) 0.37862(10) 0.57773(14) 0.0420 1.0000 Uani . . . . . . 
C17 C 0.18927(16) 0.19834(9) 0.23800(13) 0.0350 1.0000 Uani . . . . . . 
C18 C 0.04713(16) 0.15191(9) 0.36810(14) 0.0370 1.0000 Uani . . . . . . 
C19 C 0.05023(16) 0.05868(9) 0.18476(13) 0.0371 1.0000 Uani . . . . . . 
H41 H 0.5841(19) 0.2391(11) 0.2742(16) 0.0399 1.0000 Uiso . . . . . . 
H42 H 0.6660(19) 0.1680(11) 0.3638(15) 0.0393 1.0000 Uiso . . . . . . 
H51 H 0.466(2) 0.4129(12) 0.3685(16) 0.0445 1.0000 Uiso . . . . . . 
H52 H 0.495(2) 0.3533(11) 0.2782(16) 0.0432 1.0000 Uiso . . . . . . 
H61 H 0.355(2) 0.2715(12) 0.5379(16) 0.0465 1.0000 Uiso . . . . . . 
H71 H 0.194(3) 0.3771(15) 0.509(2) 0.0743 1.0000 Uiso . . . . . . 
H72 H 0.246(3) 0.4074(15) 0.405(2) 0.0744 1.0000 Uiso . . . . . . 
H101 H 0.4169(19) 0.0979(11) 0.2590(15) 0.0393 1.0000 Uiso . . . . . . 
H102 H 0.3599(19) 0.0098(11) 0.2781(15) 0.0391 1.0000 Uiso . . . . . . 
H111 H 0.103(2) -0.0269(11) 0.4097(15) 0.0405 1.0000 Uiso . . . . . . 
H112 H 0.220(2) -0.0437(11) 0.3424(15) 0.0404 1.0000 Uiso . . . . . . 
H121 H 0.2934(19) 0.1223(11) 0.5928(16) 0.0410 1.0000 Uiso . . . . . . 
H131 H 0.197(2) 0.0427(13) 0.6976(19) 0.0599 1.0000 Uiso . . . . . . 
H132 H 0.178(2) -0.0305(13) 0.6007(18) 0.0592 1.0000 Uiso . . . . . . 

loop_
_atom_site_aniso_label
_atom_site_aniso_U_11
_atom_site_aniso_U_22
_atom_site_aniso_U_33
_atom_site_aniso_U_23
_atom_site_aniso_U_13
_atom_site_aniso_U_12
Fe1 0.03028(10) 0.02640(10) 0.02791(10) -0.00148(7) 0.00969(8) -0.00466(7) 
Fe2 0.02464(9) 0.02544(10) 0.03009(10) -0.00059(7) 0.00787(7) -0.00067(7) 
O1 0.0350(5) 0.0411(6) 0.0318(5) 0.0041(4) 0.0044(4) -0.0081(4) 
O2 0.0434(7) 0.0586(8) 0.0618(8) 0.0204(7) -0.0029(6) -0.0052(6) 
O3 0.0686(9) 0.0641(8) 0.0584(8) -0.0031(7) 0.0348(7) -0.0279(7) 
O4 0.0983(12) 0.0560(8) 0.0617(9) -0.0290(7) 0.0374(9) -0.0187(8) 
O5 0.0494(7) 0.0475(7) 0.0512(7) 0.0193(6) 0.0098(6) -0.0047(5) 
O6 0.0517(8) 0.0602(8) 0.0815(10) 0.0027(7) 0.0394(7) 0.0168(6) 
O7 0.0488(7) 0.0504(7) 0.0484(7) -0.0105(6) -0.0054(6) -0.0016(6) 
C1 0.0221(6) 0.0276(6) 0.0329(6) -0.0008(5) 0.0092(5) 0.0016(5) 
C2 0.0236(6) 0.0273(6) 0.0276(6) -0.0027(5) 0.0067(5) -0.0026(5) 
C3 0.0277(6) 0.0305(7) 0.0307(6) 0.0015(5) 0.0083(5) 0.0024(5) 
C4 0.0315(7) 0.0333(7) 0.0354(7) -0.0078(6) 0.0142(6) -0.0044(6) 
C5 0.0399(8) 0.0326(7) 0.0356(7) 0.0051(6) 0.0101(6) 0.0025(6) 
C6 0.0395(8) 0.0365(8) 0.0429(8) 0.0029(6) 0.0190(7) 0.0070(6) 
C7 0.0658(13) 0.0631(13) 0.0699(13) 0.0156(11) 0.0400(11) 0.0304(10) 
C8 0.0232(6) 0.0246(6) 0.0342(6) -0.0009(5) 0.0076(5) 0.0025(5) 
C9 0.0269(6) 0.0234(6) 0.0344(7) 0.0028(5) 0.0062(5) 0.0013(5) 
C10 0.0293(7) 0.0340(7) 0.0393(7) -0.0088(6) 0.0131(6) -0.0005(5) 
C11 0.0345(7) 0.0253(6) 0.0419(8) 0.0006(6) 0.0095(6) -0.0023(5) 
C12 0.0321(7) 0.0360(7) 0.0329(7) 0.0025(6) 0.0087(6) -0.0029(6) 
C13 0.0481(10) 0.0600(11) 0.0407(9) 0.0106(8) 0.0136(7) -0.0101(8) 
C14 0.0333(7) 0.0374(8) 0.0398(8) 0.0009(6) 0.0065(6) -0.0105(6) 
C15 0.0427(8) 0.0363(8) 0.0373(7) -0.0042(6) 0.0134(6) -0.0114(6) 
C16 0.0511(9) 0.0384(8) 0.0377(8) -0.0052(7) 0.0158(7) -0.0107(7) 
C17 0.0294(7) 0.0383(8) 0.0353(7) 0.0018(6) 0.0075(6) -0.0007(6) 
C18 0.0333(7) 0.0323(7) 0.0468(8) 0.0047(6) 0.0148(6) 0.0017(6) 
C19 0.0331(7) 0.0353(7) 0.0394(8) 0.0002(6) 0.0068(6) 0.0009(6) 

_refine_ls_extinction_method 
    'None'
_oxford_refine_ls_scale 0.5571(6) 
loop_
 _geom_bond_atom_site_label_1
 _geom_bond_site_symmetry_1
 _geom_bond_atom_site_label_2
 _geom_bond_site_symmetry_2
 _geom_bond_distance
 _geom_bond_publ_flag
Fe1 . C2 . 2.0443(13)    yes
Fe1 . C3 . 2.0689(14)    yes
Fe1 . C4 . 2.0939(14)    yes
Fe1 . C5 . 2.0950(15)    yes
Fe1 . C14 . 1.7971(16)    yes
Fe1 . C15 . 1.7928(16)    yes
Fe1 . C16 . 1.7867(16)    yes
Fe2 . C8 . 2.0534(13)    yes
Fe2 . C9 . 2.0967(13)    yes
Fe2 . C10 . 2.0772(14)    yes
Fe2 . C11 . 2.1329(15)    yes
Fe2 . C17 . 1.7888(15)    yes
Fe2 . C18 . 1.8050(16)    yes
Fe2 . C19 . 1.7937(15)    yes
O1 . C1 . 1.2180(17)    yes
O2 . C14 . 1.139(2)    yes
O3 . C15 . 1.1351(19)    yes
O4 . C16 . 1.142(2)    yes
O5 . C17 . 1.1383(19)    yes
O6 . C18 . 1.1350(19)    yes
O7 . C19 . 1.1354(19)    yes
C1 . C2 . 1.5105(19)    yes
C1 . C8 . 1.4955(18)    yes
C2 . C3 . 1.4267(19)    yes
C2 . C4 . 1.4315(19)    yes
C3 . C5 . 1.427(2)    yes
C3 . C6 . 1.475(2)    yes
C4 . H41 . 0.975(18)    no
C4 . H42 . 0.950(19)    no
C5 . H51 . 0.94(2)    no
C5 . H52 . 0.961(19)    no
C6 . C7 . 1.313(2)    yes
C6 . H61 . 0.96(2)    no
C7 . H71 . 0.96(3)    no
C7 . H72 . 0.94(3)    no
C8 . C9 . 1.4367(19)    yes
C8 . C10 . 1.439(2)    yes
C9 . C11 . 1.418(2)    yes
C9 . C12 . 1.477(2)    yes
C10 . H101 . 0.951(18)    no
C10 . H102 . 0.960(18)    no
C11 . H111 . 1.000(18)    no
C11 . H112 . 0.935(18)    no
C12 . C13 . 1.320(2)    yes
C12 . H121 . 0.923(19)    no
C13 . H131 . 0.97(2)    no
C13 . H132 . 0.97(2)    no
loop_
 _geom_angle_atom_site_label_1
 _geom_angle_site_symmetry_1
 _geom_angle_atom_site_label_2
 _geom_angle_site_symmetry_2
 _geom_angle_atom_site_label_3
 _geom_angle_site_symmetry_3
 _geom_angle
 _geom_angle_publ_flag
C2 . Fe1 . C3 . 40.58(5)    yes
C2 . Fe1 . C4 . 40.45(5)    yes
C3 . Fe1 . C4 . 71.83(6)    yes
C2 . Fe1 . C5 . 71.21(6)    yes
C3 . Fe1 . C5 . 40.09(6)    yes
C4 . Fe1 . C5 . 80.04(6)    yes
C2 . Fe1 . C14 . 97.21(6)    yes
C3 . Fe1 . C14 . 127.73(6)    yes
C4 . Fe1 . C14 . 94.03(7)    yes
C5 . Fe1 . C14 . 167.63(6)    yes
C2 . Fe1 . C15 . 129.96(6)    yes
C3 . Fe1 . C15 . 129.88(7)    yes
C4 . Fe1 . C15 . 91.43(6)    yes
C5 . Fe1 . C15 . 91.50(7)    yes
C14 . Fe1 . C15 . 99.54(7)    yes
C2 . Fe1 . C16 . 123.85(6)    yes
C3 . Fe1 . C16 . 92.95(7)    yes
C4 . Fe1 . C16 . 163.97(7)    yes
C5 . Fe1 . C16 . 91.59(7)    yes
C14 . Fe1 . C16 . 91.45(8)    yes
C15 . Fe1 . C16 . 102.51(7)    yes
C8 . Fe2 . C9 . 40.49(5)    yes
C8 . Fe2 . C10 . 40.77(6)    yes
C9 . Fe2 . C10 . 71.47(6)    yes
C8 . Fe2 . C11 . 70.57(6)    yes
C9 . Fe2 . C11 . 39.16(5)    yes
C10 . Fe2 . C11 . 79.23(6)    yes
C8 . Fe2 . C17 . 101.86(6)    yes
C9 . Fe2 . C17 . 137.16(6)    yes
C10 . Fe2 . C17 . 90.85(7)    yes
C11 . Fe2 . C17 . 170.08(7)    yes
C8 . Fe2 . C18 . 117.70(6)    yes
C9 . Fe2 . C18 . 92.28(6)    yes
C10 . Fe2 . C18 . 158.20(7)    yes
C11 . Fe2 . C18 . 97.53(7)    yes
C17 . Fe2 . C18 . 91.68(7)    yes
C8 . Fe2 . C19 . 136.56(6)    yes
C9 . Fe2 . C19 . 124.65(6)    yes
C10 . Fe2 . C19 . 100.60(7)    yes
C11 . Fe2 . C19 . 85.63(7)    yes
C17 . Fe2 . C19 . 96.33(7)    yes
C18 . Fe2 . C19 . 100.64(7)    yes
O1 . C1 . C2 . 121.90(12)    yes
O1 . C1 . C8 . 120.69(12)    yes
C2 . C1 . C8 . 117.41(11)    yes
C1 . C2 . Fe1 . 125.59(9)    yes
C1 . C2 . C3 . 120.78(11)    yes
Fe1 . C2 . C3 . 70.63(8)    yes
C1 . C2 . C4 . 121.76(12)    yes
Fe1 . C2 . C4 . 71.63(8)    yes
C3 . C2 . C4 . 117.37(12)    yes
C2 . C3 . Fe1 . 68.78(7)    yes
C2 . C3 . C5 . 115.24(13)    yes
Fe1 . C3 . C5 . 70.94(8)    yes
C2 . C3 . C6 . 121.13(13)    yes
Fe1 . C3 . C6 . 125.42(11)    yes
C5 . C3 . C6 . 123.40(13)    yes
Fe1 . C4 . C2 . 67.91(7)    yes
Fe1 . C4 . H41 . 109.8(11)    no
C2 . C4 . H41 . 118.8(10)    no
Fe1 . C4 . H42 . 117.3(11)    no
C2 . C4 . H42 . 115.3(11)    no
H41 . C4 . H42 . 117.7(15)    no
Fe1 . C5 . C3 . 68.97(8)    yes
Fe1 . C5 . H51 . 117.1(12)    no
C3 . C5 . H51 . 115.9(12)    no
Fe1 . C5 . H52 . 109.9(11)    no
C3 . C5 . H52 . 122.7(11)    no
H51 . C5 . H52 . 114.1(16)    no
C3 . C6 . C7 . 124.36(17)    yes
C3 . C6 . H61 . 114.7(11)    no
C7 . C6 . H61 . 120.9(11)    no
C6 . C7 . H71 . 121.8(15)    no
C6 . C7 . H72 . 120.0(15)    no
H71 . C7 . H72 . 118(2)    no
C1 . C8 . Fe2 . 125.81(9)    yes
C1 . C8 . C9 . 121.16(12)    yes
Fe2 . C8 . C9 . 71.38(7)    yes
C1 . C8 . C10 . 122.86(12)    yes
Fe2 . C8 . C10 . 70.50(8)    yes
C9 . C8 . C10 . 115.93(12)    yes
Fe2 . C9 . C8 . 68.13(7)    yes
Fe2 . C9 . C11 . 71.80(8)    yes
C8 . C9 . C11 . 115.87(13)    yes
Fe2 . C9 . C12 . 121.67(10)    yes
C8 . C9 . C12 . 122.81(12)    yes
C11 . C9 . C12 . 120.52(13)    yes
C8 . C10 . Fe2 . 68.73(8)    yes
C8 . C10 . H101 . 117.9(11)    no
Fe2 . C10 . H101 . 119.1(11)    no
C8 . C10 . H102 . 118.0(11)    no
Fe2 . C10 . H102 . 109.7(11)    no
H101 . C10 . H102 . 115.1(15)    no
Fe2 . C11 . C9 . 69.04(8)    yes
Fe2 . C11 . H111 . 118.3(10)    no
C9 . C11 . H111 . 117.0(10)    no
Fe2 . C11 . H112 . 105.9(11)    no
C9 . C11 . H112 . 119.7(11)    no
H111 . C11 . H112 . 116.9(15)    no
C9 . C12 . C13 . 123.60(16)    yes
C9 . C12 . H121 . 116.0(11)    no
C13 . C12 . H121 . 120.4(12)    no
C12 . C13 . H131 . 120.0(13)    no
C12 . C13 . H132 . 119.7(13)    no
H131 . C13 . H132 . 120.3(18)    no
O2 . C14 . Fe1 . 177.66(14)    yes
O3 . C15 . Fe1 . 176.93(15)    yes
O4 . C16 . Fe1 . 178.29(17)    yes
O5 . C17 . Fe2 . 176.37(14)    yes
Fe2 . C18 . O6 . 179.21(14)    yes
O7 . C19 . Fe2 . 177.99(15)    yes

#------------------------------------------------------------------------------
loop_
_geom_contact_atom_site_label_1
_geom_contact_atom_site_label_2
_geom_contact_distance
_geom_contact_site_symmetry_1
_geom_contact_site_symmetry_2
_geom_contact_publ_flag
 O1        C11       3.497(2)   . 2_656 no
 O1        C5        3.587(2)   . 4 no
 O2        O3        3.103(2)   . 4 no
 O2        O5        3.165(2)   . 4_655 no
 O2        C11       3.330(2)   . 2_656 no
 O2        C17       3.386(2)   . 4_655 no
 O2        O6        3.427(2)   . 1_655 no
 O3        O7        2.989(2)   . 3_655 no
 O3        C19       3.260(2)   . 3_655 no
 O3        O7        3.292(2)   . 4_655 no
 O3        O6        3.418(2)   . 1_655 no
 O3        C11       3.558(2)   . 3_655 no
 O4        C13       3.184(2)   . 3_656 no
 O4        O7        3.334(2)   . 4_655 no
 O5        C12       3.424(2)   . 4_554 no
 O5        C6        3.552(2)   . 4_554 no
 O6        C15       3.339(2)   . 1_455 no
 O6        C14       3.350(3)   . 1_455 no
 O6        C4        3.435(2)   . 1_455 no
 O7        O7        3.102(3)   . 2 no
 O7        C15       3.265(2)   . 4_454 no
 O7        C16       3.308(2)   . 4_454 no
 O7        C7        3.369(3)   . 3_545 no
#------------------------------------------------------------------------------
loop_
_geom_torsion_atom_site_label_1
_geom_torsion_atom_site_label_2
_geom_torsion_atom_site_label_3
_geom_torsion_atom_site_label_4
_geom_torsion_site_symmetry_1
_geom_torsion_site_symmetry_2
_geom_torsion_site_symmetry_3
_geom_torsion_site_symmetry_4
_geom_torsion
_geom_torsion_publ_flag
 Fe1 C2 C1 O1 . . . . 10.0(2) no
 Fe1 C2 C1 C8 . . . . -169.2(1) no
 Fe1 C2 C3 C5 . . . . 55.2(1) no
 Fe1 C2 C3 C6 . . . . -119.5(1) no
 Fe1 C3 C2 C1 . . . . 120.6(1) no
 Fe1 C3 C2 C4 . . . . -56.1(1) no
 Fe1 C3 C6 C7 . . . . 114.1(2) no
 Fe1 C4 C2 C1 . . . . -121.0(1) no
 Fe1 C4 C2 C3 . . . . 55.6(1) no
 Fe1 C5 C3 C2 . . . . -54.1(1) no
 Fe1 C5 C3 C6 . . . . 120.4(1) no
 Fe2 C8 C1 O1 . . . . 124.8(1) no
 Fe2 C8 C1 C2 . . . . -56.0(2) no
 Fe2 C8 C9 C11 . . . . 55.3(1) no
 Fe2 C8 C9 C12 . . . . -114.5(1) no
 Fe2 C9 C8 C1 . . . . 121.2(1) no
 Fe2 C9 C8 C10 . . . . -56.3(1) no
 Fe2 C9 C12 C13 . . . . 115.9(2) no
 Fe2 C10 C8 C1 . . . . -120.7(1) no
 Fe2 C10 C8 C9 . . . . 56.7(1) no
 Fe2 C11 C9 C8 . . . . -53.5(1) no
 Fe2 C11 C9 C12 . . . . 116.6(1) no
 O1 C1 C2 C3 . . . . -77.2(2) no
 O1 C1 C2 C4 . . . . 99.3(2) no
 O1 C1 C8 C9 . . . . 36.2(2) no
 O1 C1 C8 C10 . . . . -146.6(1) no
C1 C2 Fe1 C3 . . . . -114.5(2) no
 C1 C2 Fe1 C4 . . . . 116.4(1) no
 C1 C2 Fe1 C5 . . . . -146.9(1) no
 C1 C2 Fe1 C14 . . . . 28.6(1) no
 C1 C2 Fe1 C15 . . . . 137.5(1) no
 C1 C2 Fe1 C16 . . . . -68.0(1) no
 C1 C2 C3 C5 . . . . 175.8(1) no
 C1 C2 C3 C6 . . . . 1.1(2) no
 C1 C8 Fe2 C9 . . . . -115.5(2) no
 C1 C8 Fe2 C10 . . . . 117.0(2) no
 C1 C8 Fe2 C11 . . . . -146.9(2) no
 C1 C8 Fe2 C17 . . . . 39.7(1) no
 C1 C8 Fe2 C18 . . . . -58.5(2) no
 C1 C8 Fe2 C19 . . . . 152.4(1) no
 C1 C8 C9 C11 . . . . 176.5(1) no
 C1 C8 C9 C12 . . . . 6.7(2) no
 C2 Fe1 C3 C5 . . . . -128.2(1) no
 C2 Fe1 C3 C6 . . . . 113.9(2) no
 C2 Fe1 C5 C3 . . . . 32.70(9) no
 C2 C1 C8 C9 . . . . -144.6(1) no
 C2 C1 C8 C10 . . . . 32.7(2) no
 C2 C3 Fe1 C4 . . . . 32.02(9) no
 C2 C3 Fe1 C5 . . . . 128.2(1) no
 C2 C3 Fe1 C14 . . . . -48.7(1) no
 C2 C3 Fe1 C15 . . . . 108.1(1) no
 C2 C3 Fe1 C16 . . . . -142.9(1) no
 C2 C3 C6 C7 . . . . -161.0(2) no
 C2 C4 Fe1 C3 . . . . -32.12(8) no
 C2 C4 Fe1 C5 . . . . -72.67(9) no
 C2 C4 Fe1 C14 . . . . 96.39(9) no
 C2 C4 Fe1 C15 . . . . -163.95(8) no
 C2 C4 Fe1 C16 . . . . -13.3(3) no
 C3 Fe1 C2 C4 . . . . 129.1(1) no
 C3 C2 Fe1 C4 . . . . -129.1(1) no
 C3 C2 Fe1 C5 . . . . -32.33(9) no
 C3 C2 Fe1 C14 . . . . 143.2(1) no
 C3 C2 Fe1 C15 . . . . -107.9(1) no
 C3 C2 Fe1 C16 . . . . 46.5(1) no
 C3 C2 C1 C8 . . . . 103.6(1) no
 C3 C5 Fe1 C4 . . . . 73.6(1) no
 C3 C5 Fe1 C14 . . . . 11.5(4) no
 C3 C5 Fe1 C15 . . . . 164.7(1) no
 C3 C5 Fe1 C16 . . . . -92.7(1) no
 C4 Fe1 C3 C5 . . . . -96.2(1) no
 C4 Fe1 C3 C6 . . . . 145.9(1) no
 C4 C2 Fe1 C5 . . . . 96.74(9) no
 C4 C2 Fe1 C14 . . . . -87.75(9) no
 C4 C2 Fe1 C15 . . . . 21.1(1) no
 C4 C2 Fe1 C16 . . . . 175.61(9) no
 C4 C2 C1 C8 . . . . -79.9(2) no
 C4 C2 C3 C5 . . . . -0.8(2) no
 C4 C2 C3 C6 . . . . -175.5(1) no
 C5 Fe1 C3 C6 . . . . -118.0(2) no
 C5 C3 Fe1 C14 . . . . -176.9(1) no
 C5 C3 Fe1 C15 . . . . -20.0(1) no
 C5 C3 Fe1 C16 . . . . 89.0(1) no
 C5 C3 C6 C7 . . . . 24.8(2) no
 C6 C3 Fe1 C14 . . . . 65.1(1) no
 C6 C3 Fe1 C15 . . . . -138.0(1) no
 C6 C3 Fe1 C16 . . . . -29.0(1) no
 C8 Fe2 C9 C11 . . . . -128.8(1) no
 C8 Fe2 C9 C12 . . . . 116.0(1) no
 C8 Fe2 C11 C9 . . . . 32.44(9) no
 C8 C9 Fe2 C10 . . . . 33.12(8) no
 C8 C9 Fe2 C11 . . . . 128.8(1) no
 C8 C9 Fe2 C17 . . . . -37.1(1) no
 C8 C9 Fe2 C18 . . . . -132.05(9) no
 C8 C9 Fe2 C19 . . . . 123.4(1) no
 C8 C9 C12 C13 . . . . -161.2(1) no
 C8 C10 Fe2 C9 . . . . -32.91(8) no
 C8 C10 Fe2 C11 . . . . -72.67(9) no
 C8 C10 Fe2 C17 . . . . 107.30(9) no
 C8 C10 Fe2 C18 . . . . 10.6(2) no
 C8 C10 Fe2 C19 . . . . -156.09(9) no
 C9 Fe2 C8 C10 . . . . 127.5(1) no
 C9 C8 Fe2 C10 . . . . -127.5(1) no
 C9 C8 Fe2 C11 . . . . -31.44(8) no
 C9 C8 Fe2 C17 . . . . 155.22(9) no
 C9 C8 Fe2 C18 . . . . 56.9(1) no
 C9 C8 Fe2 C19 . . . . -92.1(1) no
 C9 C11 Fe2 C10 . . . . 73.8(1) no
C9 C11 Fe2 C18 . . . . -84.3(1) no
 C9 C11 Fe2 C19 . . . . 175.5(1) no
 C10 Fe2 C9 C11 . . . . -95.7(1) no
 C10 Fe2 C9 C12 . . . . 149.1(1) no
 C10 C8 Fe2 C11 . . . . 96.06(9) no
 C10 C8 Fe2 C17 . . . . -77.3(1) no
 C10 C8 Fe2 C18 . . . . -175.57(9) no
 C10 C8 Fe2 C19 . . . . 35.4(1) no
 C10 C8 C9 C11 . . . . -0.9(2) no
 C10 C8 C9 C12 . . . . -170.7(1) no
 C11 Fe2 C9 C12 . . . . -115.2(2) no
 C11 C9 Fe2 C17 . . . . -165.9(1) no
 C11 C9 Fe2 C18 . . . . 99.1(1) no
 C11 C9 Fe2 C19 . . . . -5.5(1) no
 C11 C9 C12 C13 . . . . 29.4(2) no
 C12 C9 Fe2 C17 . . . . 78.9(2) no
 C12 C9 Fe2 C18 . . . . -16.0(1) no
 C12 C9 Fe2 C19 . . . . -120.6(1) no
#------------------------------------------------------------------------------


_iucr_refine_instructions_details_constraints
;
#
# Punched on 21/06/13 at 12:56:19
#
#LIST     12                                                                    
BLOCK 
CONT SCALE 
CONT FE   (    1 ,X'S,U'S)  UNTIL C    (   19 ) 
CONT H    (   41 ,X'S)  UNTIL H    (  132 ) 
END                                                                             
;


_iucr_refine_instructions_details_restraints
;
#
# Punched on 21/06/13 at 12:56:19
#
#LIST     16                                                                    
NO 
REM   HREST   START (DO NOT REMOVE THIS LINE) 
REM   HREST   END (DO NOT REMOVE THIS LINE) 
END                                                                             
;

# Manually omitted reflections

loop_
_oxford_refln_omitted_index_h
_oxford_refln_omitted_index_k
_oxford_refln_omitted_index_l
_oxford_refln_omitted_flag
_oxford_refln_omitted_details
  -1   1   1  x   .
   0   2   1  x   .


#===END
